# Supplementary material
Source: MDPI journal article supplement (https://www.mdpi.com/2072-4292/15/15/3872)
Supplement: s1 [file s1]

**Supplemental Table S1:** List of true mangrove species.

|    |                                |
|----|--------------------------------|
| 1  | <i>Acrostichum aureum</i>      |
| 2  | <i>Acrostichum speciosum</i>   |
| 3  | <i>Aegialitis annulata</i>     |
| 4  | <i>Aegialitis rotundifolia</i> |
| 5  | <i>Aegiceras corniculatum</i>  |
| 6  | <i>Avicennia alba</i>          |
| 7  | <i>Avicennia bicolor</i>       |
| 8  | <i>Avicennia bicolor</i>       |
| 9  | <i>Avicennia germinans</i>     |
| 10 | <i>Avicennia integra</i>       |
| 11 | <i>Avicennia marina</i>        |
| 12 | <i>Avicennia officinalis</i>   |
| 13 | <i>Avicennia rumphiana</i>     |
| 14 | <i>Avicennia schaueriana</i>   |
| 15 | <i>Bruguiera cylindrica</i>    |
| 16 | <i>Bruguiera exaristata</i>    |
| 17 | <i>Bruguiera gymnorhiza</i>    |

|    |                                    |
|----|------------------------------------|
| 18 | <i>Bruguiera hainesii</i>          |
| 19 | <i>Bruguiera parviflora</i>        |
| 20 | <i>Bruguiera sexangula</i>         |
| 21 | <i>Camptostemon schultzii</i>      |
| 22 | <i>Camptostemon philippinensis</i> |
| 23 | <i>Ceriops australis</i>           |
| 24 | <i>Ceriops decandra</i>            |
| 25 | <i>Ceriops tagal</i>               |
| 26 | <i>Excoecaria agallocha</i>        |
| 27 | <i>Kandelia candel</i>             |
| 28 | <i>Kandelia obovata</i>            |
| 29 | <i>Laguncularia racemosa</i>       |
| 30 | <i>Lumnitzera littorea</i>         |
| 31 | <i>Lumnitzera racemosa</i>         |
| 32 | <i>Nypa fruticans</i>              |
| 33 | <i>Osbornia octodonta</i>          |
| 34 | <i>Pelliciera rhizophorae</i>      |
| 35 | <i>Rhizophora apiculata</i>        |

|    |                                  |
|----|----------------------------------|
| 36 | <i>Rhizophora harrisonii</i>     |
| 37 | <i>Rhizophora lamarckii</i>      |
| 38 | <i>Rhizophora mangle</i>         |
| 39 | <i>Rhizophora mucronata</i>      |
| 40 | <i>Rhizophora racemosa</i>       |
| 41 | <i>Rhizophora samoensis</i>      |
| 42 | <i>Rhizophora stylosa</i>        |
| 43 | <i>Scyphiphora hydrophylacea</i> |
| 44 | <i>Sonneratia alba</i>           |
| 45 | <i>Sonneratia apetala</i>        |
| 46 | <i>Sonneratia caseolaris</i>     |
| 47 | <i>Sonneratia x gulngai</i>      |
| 48 | <i>Sonneratia x hainanensis</i>  |
| 49 | <i>Sonneratia ovata</i>          |
| 50 | <i>Xylocarpus granatum</i>       |
| 51 | <i>Xylocarpus moluccensis</i>    |
