# Supplementary material
Source: MDPI journal article supplement (https://www.mdpi.com/2072-4292/15/15/3872)
Supplement: s1 [file s1]

**Supplemental Table S3:** Estimators of land use and cover with stratified random sampling for hexagons and centroids (categorical 0/1).

| Hexagons                                            |                                                                                        |                                                                      |
|-----------------------------------------------------|----------------------------------------------------------------------------------------|----------------------------------------------------------------------|
| Concept                                             | Formula                                                                                | Comments                                                             |
| Average proportion in the stratum                   | $\bar{y}_{gh} = \frac{1}{n_{gh}} \sum_{i \in gh} y_i$                                  | $n_{gh}$ is the sample size in stratum $gh$                          |
| Estimated proportion from stratified sample         | $\bar{y}_{str} = \sum_{gh} \frac{N_{gh}}{N} \bar{y}_{gh}$                              | $N_{gh}$ is the population size in stratum $gh$                      |
| Estimated area in the stratum                       | $\hat{A}_{gh} = D_{gh} \bar{y}_{gh}$                                                   | $D_{gh}$ is the area of stratum $gh$                                 |
| Overall estimated area                              | $\hat{A} = \sum_{gh} \hat{A}_{gh} = D \bar{y}_{str}$                                   |                                                                      |
| Overall estimated area (equivalent formula)         | $\hat{A} = \sum w_i y_i$                                                               | Weight $w_i = \frac{D_{gh}}{n_{gh}}$ ,<br>$i \in \text{stratum } gh$ |
| Estimated variance of the proportion in stratum $h$ | $V(\bar{y}_{gh}) = \frac{1}{n_{gh}(n_{gh} - 1)} \sum_{i=1}^{n_{gh}} (y_i - \bar{y})^2$ |                                                                      |
| Variance in stratum $gh$                            | $V(\hat{A}_{gh}) = D_{gh}^2 Var(\bar{y}_{gh})$                                         |                                                                      |
| Variance of the overall estimated area              | $V(\hat{A}) = \sum_{gh} Var(\hat{A}_{gh})$                                             |                                                                      |
| Centroids                                           |                                                                                        |                                                                      |
| Concept                                             | Formula                                                                                | Comments                                                             |
| Proportion of class $c$ in the stratum              | $\bar{z}_{gh} = p_{gh} = \frac{n_{cgh}}{n_{gh}}$                                       | $n_{cgh}$ is the number units of class $c$ in stratum $gh$           |
| Estimated proportion from stratified sample         | $\bar{z}_{str} = \sum_{gh} \frac{N_{gh}}{N} p_{gh}$                                    |                                                                      |
| Estimated area in the stratum                       | $\hat{A}_{gh} = D_{gh} p_{gh}$                                                         |                                                                      |
| Overall estimated area                              | $\hat{A} = \sum_{gh} \hat{A}_{gh} = D \bar{z}_{str}$                                   |                                                                      |
| Estimated variance of the proportion in stratum $h$ | $V(p_{gh}) = \frac{p_{gh}(1 - p_{gh})}{n_{gh} - 1}$                                    |                                                                      |
| Variance in stratum $gh$                            | $V(\hat{A}_{gh}) = D_{gh}^2 Var(p_{gh})$                                               |                                                                      |
| Variance of the overall estimated area              | $V(\hat{A}) = \sum_{gh} Var(\hat{A}_{gh})$                                             |                                                                      |
