# Supplementary material
Source: MDPI journal article supplement (https://www.mdpi.com/2072-4292/15/15/3872)
Supplement: s1 [file s1]

**Supplemental Table S2:** the number of hexagons per strata. Each strata is defined by the FRA Subregion and the 4 change strata. Each hexagon has an area of 39.62 ha (.3962 km<sup>2</sup>). A randomly sample was selected from each stratum with a probability proportional to the size of the stratum.

|        | Class                                           | N of hexagons per strata | Hexagon area (km <sup>2</sup> ) | W <sub>i</sub> |
|--------|-------------------------------------------------|--------------------------|---------------------------------|----------------|
| Strata | Eastern and Southern Africa Big Change          | 1,211                    | 479.8                           | 0.1%           |
|        | Eastern and Southern Africa Small Change        | 7,198                    | 2,851.8                         | 0.7%           |
|        | Eastern and Southern Africa No Change No Forest | 14,407                   | 5,708.1                         | 1.5%           |
|        | Eastern and Southern Africa No Change Forest    | 28,521                   | 11,300.0                        | 2.9%           |
|        | East Asia Big Change                            | 6                        | 134.3                           | 0.0%           |
|        | East Asia Small Change                          | 339                      | 647.8                           | 0.0%           |
|        | East Asia No Change No Forest                   | 1,635                    | 454.4                           | 0.2%           |
|        | East Asia No Change Forest                      | 1,147                    | 1,556.7                         | 0.1%           |
|        | North and Central America Big Change            | 3,929                    | 9,855.1                         | 0.4%           |
|        | North and Central America Small Change          | 24,874                   | 19,863.9                        | 2.5%           |
|        | North and Central America No Change No Forest   | 50,136                   | 27,725.7                        | 5.1%           |
|        | North and Central America No Change Forest      | 69,979                   | 1,005.2                         | 7.2%           |
|        | Oceania Big Change                              | 2,537                    | 4,380.8                         | 0.3%           |
|        | Oceania Small Change                            | 11,057                   | 22,714.1                        | 1.1%           |
|        | Oceania No Change No Forest                     | 57,330                   | 31,367.9                        | 5.9%           |
|        | Oceania No Change Forest                        | 79,172                   | 4,166.0                         | 8.1%           |
|        | South America Big Change                        | 10,515                   | 9,177.6                         | 1.1%           |
|        | South America Small Change                      | 23,164                   | 10,931.2                        | 2.4%           |
|        | South America No Change No Forest               | 27,590                   | 25,224.5                        | 2.8%           |
|        | South America No Change Forest                  | 63,666                   | 7,598.7                         | 6.5%           |
|        | South and Southeast Asia Big Change             | 19,179                   | 27,625.8                        | 2.0%           |
|        | South and Southeast Asia Small Change           | 69,727                   | 39,614.1                        | 7.1%           |
|        | South and Southeast Asia No Change No Forest    | 99,985                   | 75,442.0                        | 10.2%          |
|        | South and Southeast Asia No Change Forest       | 190,414                  | 4,323.7                         | 19.5%          |
|        | Western and Central Africa Big Change           | 10,913                   | 7,939.1                         | 1.1%           |
|        | Western and Central Africa Small Change         | 20,038                   | 7,256.0                         | 2.1%           |
|        | Western and Central Africa No Change No Forest  | 18,314                   | 25,948.7                        | 1.9%           |
|        | Western and Central Africa No Change Forest     | 65,494                   | 645.8                           | 6.7%           |
|        | Western and Central Asia No Change No Forest    | 1,630                    | 727.0                           | 0.2%           |
|        | Western and Central Asia No Change Forest       | 1,835                    | 386,665.8                       | 0.2%           |
|        | <b>Total</b>                                    | <b>975,942</b>           | <b>38,666,822</b>               | <b>100%</b>    |
