# Supplementary material
Source: MDPI journal article supplement (https://www.mdpi.com/2072-4292/15/15/3872)
Supplement: s1 [file s1]

Archive with 4 entries (4 files):
- SupData.xlsx
- Table S1.pdf
- Table S2.pdf
- Table S3.pdf
