# Supplementary material
Source: MDPI journal article supplement (https://www.mdpi.com/2072-4292/15/15/3872)
Supplement: s1 [file s1 › SupData.xlsx]

## Sheet: Hexagon 2020 Area
		km2	km2	km2		km2	Mangroves 2020	CVMangroves	± pct
Strata	Average of % of Mangroves	Strata	Mangroves	Var		North and C. America	18455.3	0.0226877	0.0444679
EAF1	56.2019	479.798	269.656	80.2533		South America	21400.5	0.0173277	0.0339624
EAF2	20.8654	2851.85	595.049	3114.58		Western and Central Africa	20925.9	0.0193831	0.0379909
EAF3	10.292	5708.05	587.471	5722.44		Eastern and Southern Africa	7264.19	0.0346211	0.0678575
EAF4	51.4337	11300	5812.02	54332.3		Western and Central Asia	209.14	0.232491	0.455682
EAS2	13.3333	134.312	17.9082	20.0441		East Asia	150.374	0.17727	0.347449
EAS3	5.14286	647.787	33.3148	59.0401		South and Southeast Asia	64755.1	0.0103476	0.0202813
EAS4	21.8182	454.441	99.1509	631.498		Oceania	14610.6	0.0245467	0.0481116
NCA1	67.3887	1556.67	1049.02	415.837		World	147771	0.00716583	0.014045
NCA2	25.9164	9855.08	2554.08	24068
NCA3	7.74974	19863.9	1539.4	16796.4
NCA4	48.0161	27725.7	13312.8	134036
OCE1	57.1463	1005.16	574.412	346.78
OCE2	20.9434	4380.78	917.485	6688.79
OCE3	4.03687	22714.1	916.94	3347.83
OCE4	38.8988	31367.9	12201.8	118241
SAM1	71.774	4166.04	2990.14	901.085
SAM2	27.3927	9177.58	2513.99	18946.8
SAM3	7.37052	10931.2	805.683	9916.85
SAM4	59.8256	25224.5	15090.7	107744
SSA1	69.4509	7598.72	5277.38	2185.24
SSA2	32.458	27625.8	8966.79	81839.8
SSA3	9.80564	39614.1	3884.41	44814.4
SSA4	61.8044	75442	46626.5	320140
WAF1	67.744	4323.73	2929.07	1124.06
WAF2	28.1749	7939.06	2236.82	20756.8
WAF3	11.0875	7256.01	804.512	8975.54
WAF4	57.6347	25948.7	14955.5	133662
WAS3	4.61538	645.806	29.8064	105.624
WAS4	24.6667	727.027	179.333	2258.58
Grand Total	45.7865	386668	177042	1.12482e+06

## Sheet: Hexagon Area Change
	Average % Mangrove Change								km2	Area km2								Var										2000-2010
Strata	Average % Mangrove Loss 2000-2010	Average % Mangrove Gain 2000-2010	Average % Mangrove Loss 2010-2020	Average % Mangrove Gain 2010-2020	Average % Mangrove Loss 2000-2020	Average % Mangrove Gain 2000-2020	Average of Total % Change 2000-2010	Average of Total % Change 2010-2020	Strata	Mgrloss 2000-2010	Mgrgain 2000-2010	Mgrloss 2010-2020	Mgrgain 2010-2020	Mgrloss 2000-2020	Mgrgain 2000-2020	Change 2000-2010	Change 2010-2020	VMgrloss 2000-2010	VMgrgain 2000-2010	Vmgrloss 2010-2020	VMgrgain 2010-2020	VMgrloss 2000-2020	VMgrgain 2000-2020	Vchange 2000-2010	Vchange 2010-2020		km2	Mgrloss 0010	CVMgrloss 0010	± pct	Mgrgain 0010	CVMgrgain 0010	± pct
EAF1	0.336538	1.77885	0.240385	0.480769	0.576923	2.25962	1.44231	0.240385	479.798	1.61471	8.53487	1.15336	2.30672	2.76807	10.8416	6.92017	1.15336	1.00327	8.14931	1.33024	2.11296	4.45419	11.5691	9.28573	3.46891		North and C. America	328.274	0.207141	0.405996	192.216	0.188108	0.368692
EAF2	0.0961538	0.865385	0.673077	1.25	0.673077	2.01923	0.769231	0.576923	2851.85	2.74216	24.6795	19.1951	35.6481	19.1951	57.5854	21.9373	16.453	7.51945	153.528	201.419	298.953	277.344	795.382	162.362	513.659		South America	360.995	0.15618	0.306112	508.456	0.11009	0.215776
EAF3	0.474453	0.145985	0.474453	0.474453	0.948905	0.620438	-0.328467	0	5708.05	27.082	8.33292	27.082	27.082	54.164	35.4149	-18.7491	0	472.09	43.3031	454.667	454.667	921.384	505.028	517.046	914.707		Western and Central Africa	304.373	0.193889	0.380023	50.6374	0.593997	1.16423
EAF4	1.14695	0.573477	0.824373	0.967742	1.72043	1.29032	-0.573477	0.143369	11300	129.606	64.803	93.1543	109.355	194.409	145.807	-64.803	16.2007	2804.14	1269.01	2257.14	1389.27	4407.84	2656.39	4133.57	3719.7		Eastern and Southern Africa	161.045	0.355881	0.697527	106.35	0.361001	0.707563
EAS2	0	10	0	0	0	10	10	0	134.312	0	13.4312	0	0	0	13.4312	13.4312	0	0	60.1322	0	0	0	60.1322	60.1322	0		Western and Central Asia	0	0	0	0	0	0
EAS3	0	0.571429	0	1.42857	0	2	0.571429	1.42857	647.787	0	3.70164	0	9.2541	0	12.9557	3.70164	9.2541	0	6.64957	0	15.1127	0	26.7998	6.64957	15.1127		East Asia	0	0	0	29.5267	0.408232	0.800134
EAS4	0	2.72727	0	3.63636	0	6.36364	2.72727	3.63636	454.441	0	12.3939	0	16.5251	0	28.919	12.3939	16.5251	0	78.5106	0	47.7891	0	122.886	78.5106	47.7891		South and Southeast Asia	2607.25	0.0742465	0.145523	1052.83	0.0895122	0.175444
NCA1	0.504451	0.845697	0.74184	0.860534	1.18694	1.64688	0.341246	0.118694	1556.67	7.85264	13.1647	11.548	13.3957	18.4768	25.6366	5.31208	1.84768	3.6479	9.73235	9.63145	8.81506	14.8782	24.6124	13.6875	18.9062		Oceania	65.7775	0.324127	0.635289	72.8126	0.383444	0.75155
NCA2	0.932476	0.643087	0.514469	0.675241	1.38264	1.25402	-0.289389	0.160772	9855.08	91.8962	63.3767	50.7014	66.5455	136.26	123.585	-28.5195	15.8442	1312.59	531.034	314.073	539.78	1763.49	1169.68	1881.2	875.62		World	3827.71	0.059859	0.117324	2012.83	0.0640591	0.125556
NCA3	0.252366	0.0210305	0.0736067	0.231335	0.304942	0.231335	-0.231335	0.157729	19863.9	50.1297	4.17747	14.6212	45.9522	60.5734	45.9522	-45.9522	31.331	556.384	8.71645	30.3469	425.784	585.738	417.049	565.541	457.545
NCA4	0.643432	0.402145	0.616622	0.656836	1.16622	0.965147	-0.241287	0.0402145	27725.7	178.396	111.497	170.963	182.112	323.342	267.594	-66.8984	11.1497	2751.24	757.877	2837.72	2376	5295.44	3444.75	3562.52	5297.3			2010-2020
OCE1	0.97561	0.634146	0.878049	0.341463	1.80488	0.926829	-0.341463	-0.536585	1005.16	9.80643	6.37418	8.82579	3.43225	18.1419	9.31611	-3.43225	-5.39354	9.76651	4.72072	9.08817	1.77872	25.4646	8.58441	14.7929	11.015			Mgrloss 1020	CVMgrloss 1020	± pct	Mgrgain 1020	CVMgrgain1020	± pct
OCE2	0.125786	0.125786	0	0.125786	0.125786	0.251572	0	0.125786	4380.78	5.51042	5.51042	0	5.51042	5.51042	11.0208	0	5.51042	30.3647	30.3647	0	30.3647	30.3647	60.3451	61.1138	30.3647		North and C. America	247.833	0.227959	0.446799	308.006	0.187926	0.368336
OCE3	0.0276498	0.0737327	0	0.0460829	0.0276498	0.119816	0.0460829	0.0460829	22714.1	6.28041	16.7478	0	10.4673	6.28041	27.2151	10.4673	10.4673	13.1236	52.3811	0	21.8322	13.1236	91.4366	65.6988	21.8322		South America	515.59	0.140355	0.275095	388.06	0.170328	0.333843
OCE4	0.140845	0.140845	0.153649	0.0256082	0.243278	0.115237	0	-0.128041	31367.9	44.1802	44.1802	48.1966	8.03276	76.3113	36.1474	0	-40.1638	401.298	692.034	578.494	64.5253	751.678	369.821	1098.34	644.012		Western and Central Africa	332.925	0.179228	0.351287	72.694	0.443899	0.870043
SAM1	0.704148	5.02183	1.72489	2.19432	2.03603	6.82314	4.31769	0.469432	4166.04	29.3351	209.212	71.8597	91.4164	84.8217	284.255	179.877	19.5568	23.7965	286.333	68.2717	103.264	92.4638	409.534	315.695	178.711		Eastern and Southern Africa	140.585	0.384015	0.75267	174.392	0.265575	0.520527
SAM2	0.957096	1.71617	1.65017	1.28713	2.34323	2.73927	0.759076	-0.363036	9177.58	87.8382	157.503	151.445	118.127	215.052	251.399	69.6648	-33.3179	738.436	1979.69	2004.3	1454.15	2875.19	3757.92	2809.75	3576.93		Western and Central Asia	0	0	0	0	0	0
SAM3	0.318725	0.458167	0.258964	0.358566	0.438247	0.677291	0.139442	0.0996016	10931.2	34.8403	50.083	28.3078	39.1954	47.9055	74.0357	15.2427	10.8876	178.118	246.8	88.6708	281.997	261.479	530.681	431.883	375.097		East Asia	0	0	0	25.7792	0.307653	0.603
SAM4	0.828488	0.363372	1.04651	0.552326	1.75872	0.799419	-0.465116	-0.494186	25224.5	208.982	91.6587	263.977	139.321	443.628	201.649	-117.323	-124.656	2238.37	620.469	3075.52	2529.46	8396.3	3131.23	2914.61	5712.05		South and Southeast Asia	1576.17	0.0932778	0.182824	849.32	0.103584	0.203024
SSA1	2.22087	2.19341	1.52837	1.33313	3.53874	3.31605	-0.0274558	-0.195241	7598.72	168.757	166.671	116.137	101.301	268.899	251.977	-2.08629	-14.8358	198.363	188.954	121.18	105.609	345.492	323.617	401.581	233.969		Oceania	57.0224	0.425098	0.833192	27.4428	0.396673	0.777479
SSA2	2.33193	1.32353	1.84874	0.934874	4.06513	2.14286	-1.0084	-0.913866	27625.8	644.216	365.636	510.73	258.267	1123.03	591.982	-278.58	-252.463	8313.66	3130.16	8054.28	2315.47	17008.5	6442.72	11871.7	10647.2		World	2870.13	0.0671157	0.131547	1845.69	0.0743407	0.145708
SSA3	0.544218	0.189504	0.228377	0.354713	0.719145	0.490768	-0.354713	0.126336	39614.1	215.587	75.0704	90.4694	140.516	284.882	194.413	-140.516	50.0469	1741.92	408.734	511.29	980.162	2080.93	1453.29	2166.39	1503.81
SSA4	2.09258	0.590458	1.1384	0.462919	3.04676	0.869154	-1.50213	-0.675484	75442	1578.69	445.454	858.835	349.236	2298.54	655.708	-1133.23	-509.599	27218.9	5153.58	12928.6	4338.45	42289.9	9910.35	32960.9	17550.6		km2	TOT loss 2000-2020	Annual loss	CVTotloss 0020	± pct
WAF1	0.428416	0.113883	0.58026	0.0704989	0.981562	0.157267	-0.314534	-0.509761	4323.73	18.5236	4.92399	25.0889	3.04818	42.4401	6.79979	-13.5996	-22.0407	12.3008	6.53287	20.6168	2.69038	37.2537	11.4717	18.9326	23.3901		North and C. America	538.652	26.9326	0.162477	0.318456
WAF2	1.06464	0.0380228	0.798479	0.608365	1.86312	0.646388	-1.02662	-0.190114	7939.06	84.5223	3.01865	63.3917	48.2984	147.914	51.3171	-81.5036	-15.0933	924.025	9.11226	560.926	869.212	2120.93	877.212	935.085	1453.51		South America	791.407	39.5704	0.13624	0.26703
WAF3	1.00796	0.0530504	0.424403	0.0265252	1.43236	0.0795756	-0.954907	-0.397878	7256.01	73.1375	3.84934	30.7947	1.92467	103.932	5.77401	-69.2881	-28.8701	802.899	14.8174	160.903	3.70436	1330.67	18.4824	819.214	164.923		Western and Central Africa	632.241	31.6121	0.149671	0.293355
WAF4	0.494012	0.149701	0.823353	0.0748503	1.3024	0.209581	-0.344311	-0.748503	25948.7	128.19	38.8454	213.65	19.4227	337.955	54.3836	-89.3444	-194.227	1743.5	874.249	2818.01	165.669	5465.64	1295.22	2632.68	2996.12		Eastern and Southern Africa	270.536	13.5268	0.276883	0.54269
WAS3	0	0	0	0	0	0	0	0	645.806	0	0	0	0	0	0	0	0	0	0	0	0	0	0	0	0		Western and Central Asia	0	0	0	0
WAS4	0	0	0	0	0	0	0	0	727.027	0	0	0	0	0	0	0	0	0	0	0	0	0	0	0	0		East Asia	0	0	0	0
																											South and Southeast Asia	3975.35	198.767	0.0624964	0.122493
																											Oceania	106.244	5.3122	0.269631	0.528477
																											World	6314.43	315.721	0.0491694	0.0963721
																											km2	TOT gain 2000-2020	Annual gain	CVTotgain 0020	± pct
																											North and C. America	462.767	23.1384	0.153654	0.301162
																											South America	811.339	40.5669	0.109059	0.213755
																											Western and Central Africa	118.274	5.91372	0.396786	0.7777
																											Eastern and Southern Africa	249.649	12.4824	0.252335	0.494576
																											Western and Central Asia	0	0	0	0
																											East Asia	55.3059	2.7653	0	0
																											South and Southeast Asia	1694.08	84.704	0.0794813	0.155783
																											Oceania	83.6995	4.18497	0.275101	0.539197
																											World	3475.11	173.756	0.0560403	0.109839
																											km2	TOT Change 0010	CV Change 0010	± pct
																											North and C. America	-136.058	-0.570401	-1.11799
																											South America	147.461	0.545557	1.06929
																											Western and Central Africa	-253.736	-0.261599	-0.512734
																											Eastern and Southern Africa	-54.6946	-1.26964	-2.4885
																											Western and Central Asia	0	N/A	N/A
																											East Asia	29.5267	0.408232	0.800134
																											South and Southeast Asia	-1554.42	-0.140063	-0.274524
																											Oceania	7.0351	5.00531	9.8104
																											World	-1814.88	-0.14631	-0.286767
																											km2	TOT Change 1020	CV Change 1020	±
																											North and C. America	60.1726	1.35516	2.65612
																											South America	-127.529	-0.777945	-1.52477
																											Western and Central Africa	-260.231	-0.2617	-0.512932
																											Eastern and Southern Africa	33.8071	2.12305	4.16118
																											Western and Central Asia	0	N/A	N/A
																											East Asia	25.7792	0.307653	0.603
																											South and Southeast Asia	-726.851	-0.238039	-0.466556
																											Oceania	-29.5796	-0.899055	-1.76215
																											World	-1024.43	-0.233027	-0.456732

## Sheet: Centroid Change
	Counts					Proportion				km2	Area				Var					km2
Strata	MgrGain 0010	MgrLoss 0010	MgrGain 1020	MgrLoss 1020	nsamp	MgrGain 0010	MgrLoss 0010	MgrGain 1020	MgrLoss 1020	AreaStr	MgrGain 0010	MgrLoss 0010	MgrGain 1020	MgrLoss 1020	VMgrGain 0010	VMgrLoss 0010	VMgrGain 1020	VMgrLoss 1020			MgrLoss 0010	MgrGain 0010	MgrLoss 1020	MgrGain 1020
EAF1	8	1	1	1	208	0.0384615	0.00480769	0.00480769	0.00480769	479.798	18.4538	2.30672	2.30672	2.30672	41.1282	5.32097	5.32097	5.32097		North and C. America	398.441	254.418	339.694	437.069
EAF2		1	2		104	0	0.00961538	0.0192308	0	2851.85	0	27.4216	54.8432	0	0	751.945	1489.29	0		South America	353.537	413.542	658.966	586.6
EAF3	1	1	1	1	274	0.00364964	0.00364964	0.00364964	0.00364964	5708.05	20.8323	20.8323	20.8323	20.8323	433.985	433.985	433.985	433.985		Western and Central Africa	364.838	119.601	295.67	192.602
EAF4	1	6	3	3	279	0.00358423	0.0215054	0.0107527	0.0107527	11300	40.5019	243.011	121.506	121.506	1640.4	9665.38	4885.8	4885.8		Eastern and Southern Africa	293.572	79.788	144.645	199.488
EAS2	1				3	0.333333	0	0	0	134.312	44.7706	0	0	0	2004.41	0	0	0		Western and Central Asia	0	0	0	0
EAS3					35	0	0	0	0	647.787	0	0	0	0	0	0	0	0		East Asia	0	44.7706	0	41.3129
EAS4			1		11	0	0	0.0909091	0	454.441	0	0	41.3129	0	0	0	1706.75	0		South and Southeast Asia	3294	1460.51	1847.67	1008.97
NCA1	7	1	6	5	674	0.0103858	0.00148368	0.00890208	0.0074184	1556.67	16.1672	2.3096	13.8576	11.548	37.0068	5.33425	31.7677	26.5127		Oceania	170.462	40.5476	99.9405	112.783
NCA2	4	4	5	2	311	0.0128617	0.0128617	0.0160772	0.00643087	9855.08	126.753	126.753	158.442	63.3767	3977.74	3977.74	4955.98	2001.83		World	4874.85	2413.17	3386.59	2578.83
NCA3		4	2	2	951	0	0.0042061	0.00210305	0.00210305	19863.9	0	83.5495	41.7747	41.7747	0	1739.62	871.645	871.645
NCA4	3	5	6	6	746	0.00402145	0.00670241	0.0080429	0.0080429	27725.7	111.497	185.829	222.995	222.995	4132.76	6869.4	8232.15	8232.15		Variance
OCE1	8	4	2	8	410	0.0195122	0.0097561	0.00487805	0.0195122	1005.16	19.6129	9.80643	4.90322	19.6129	47.2601	23.8652	11.9914	47.2601			VMgrLoss 0010	VMgrGain 0010	VMgrLoss 1020	VMgrGain 1020
OCE2			1		159	0	0	0.00628931	0	4380.78	0	0	27.5521	0	0	0	759.118	0		North and C. America	12592.1	8147.51	11132.1	14091.5
OCE3	1				1085	0.000921659	0	0	0	22714.1	20.9347	0	0	0	438.262	0	0	0		South America	10851	4683.13	19353.2	15522.5
OCE4		4	2	2	781	0	0.00512164	0.00256082	0.00256082	31367.9	0	160.655	80.3276	80.3276	0	6427.71	3222.13	3222.13		Western and Central Africa	11109.2	3952.06	9162.96	6936.41
SAM1	119	12	43	40	1832	0.0649563	0.00655022	0.0234716	0.0218341	4166.04	270.611	27.2885	97.7838	90.9616	575.722	61.6823	217.264	202.445		Eastern and Southern Africa	10856.6	2115.51	5325.1	6814.39
SAM2	4	4	6	4	303	0.0132013	0.0132013	0.019802	0.0132013	9177.58	121.156	121.156	181.734	121.156	3633.25	3633.25	5413.42	3633.25		Western and Central Asia	0	0	0	0
SAM3	1	1	4	2	502	0.00199203	0.00199203	0.00796813	0.00398406	10931.2	21.7752	21.7752	87.1009	43.5504	474.16	474.16	1885.28	946.427		East Asia	0	2004.41	0	1706.75
SAM4		5	6	11	688	0	0.00726744	0.00872093	0.0159884	25224.5	0	183.317	219.981	403.298	0	6681.92	8006.56	14571.1		South and Southeast Asia	96451.2	39115.1	55007.7	26687.6
SSA1	99	91	51	58	3278	0.0302013	0.0277608	0.0155583	0.0176937	7598.72	229.492	210.947	118.223	134.45	516.074	475.565	269.871	306.246		Oceania	6451.58	485.522	3269.39	3993.24
SSA2	17	33	15	22	952	0.0178571	0.0346639	0.0157563	0.0231092	27625.8	493.319	957.618	435.281	638.412	14074.6	26853.8	12445.4	18116.8		World	148312	60503.2	103251	75752.4
SSA3	5	16	7	4	2058	0.00242954	0.00777454	0.00340136	0.00194363	39614.1	96.2441	307.981	134.742	76.9953	1848.98	5885.04	2586.05	1479.91
SSA4	18	51	9	28	2117	0.0085026	0.0240907	0.0042513	0.0132263	75442	641.453	1817.45	320.727	997.816	22675.4	63236.8	11386.3	35104.7		CV
WAF1	5	5	3	13	1844	0.0027115	0.0027115	0.0016269	0.00704989	4323.73	11.7238	11.7238	7.03427	30.4818	27.4297	27.4297	16.4757	71.0071			CV MgrLoss 0010	CV MgrGain 0010	CV MgrLoss 1020	CV MgrGain 1020
WAF2	1	4	1	3	263	0.00380228	0.0152091	0.00380228	0.0114068	7939.06	30.1865	120.746	30.1865	90.5596	911.226	3603.17	911.226	2712.81		North and C. America	0.281634	0.354784	0.3106	0.2716
WAF3		4		1	377	0	0.0106101	0	0.00265252	7256.01	0	76.9868	0	19.2467	0	1469.92	0	370.436		South America	0.294646	0.165481	0.211112	0.212393
WAF4	2	4	4	4	668	0.00299401	0.00598802	0.00598802	0.00598802	25948.7	77.6908	155.382	155.382	155.382	3013.4	6008.71	6008.71	6008.71		Western and Central Africa	0.288896	0.525626	0.323751	0.43242
WAS3					26	0	0	0	0	645.806	0	0	0	0	0	0	0	0		Eastern and Southern Africa	0.354922	0.576462	0.504501	0.413806
WAS4					15	0	0	0	0	727.027	0	0	0	0	0	0	0	0		Western and Central Asia	NA	NA	NA	NA
Grand Total	305	261	181	220	20954															East Asia	NA	1	NA	1
																				South and Southeast Asia	0.0942824	0.135415	0.126937	0.161911
																				Oceania	0.471201	0.543425	0.572126	0.560298
																				World	0.0789999	0.10193	0.094882	0.106727

## Sheet: Drivers Mangrove Loss
2000-10																														Total changes				Area Km2 calibrated										km2
	counts										proportion									km2	Raw									from centroids		from hexagons													Aquac0010	Coal0010	Dsettle0010	Indsettle0010	NDisast0010
Strata	Aquac0010	Coal0010	Dsettle0010	Indsettle0010	NDisast0010	Retract0010	Oil palm0010	Other0010	Rice0010	nsamp	Aquac0010	Coal0010	Dsettle0010	Indsettle0010	NDisast0010	Retract0010	Oil palm0010	Other0010	Rice0010	AreaStr	Aquac0010	Coal0010	Dsettle0010	Indsettle0010	NDisast0010	Retract0010	Oil palm0010	Other0010	Rice0010	MgrGain 0010	MgrLoss 0010	Mgrgain 2000-2010	Mgrloss 2000-2010	Aquac0010	Coal0010	Dsettle0010	Indsettle0010	NDisast0010	Retract0010	Oil palm0010	Other0010	Rice0010		North and C. America	48.2116	94.3324	48.2116	0	0
EAF1		1								208	0	0.00480769	0	0	0	0	0	0	0	479.798	0	2.30672	0	0	0	0	0	0	0	18.4538	2.30672	8.53487	1.61471	0	1.61471	0	0	0	0	0	0	0		South America	4.88919	0	0	2.44459	0
EAF2								1		104	0	0	0	0	0	0	0	0.00961538	0	2851.85	0	0	0	0	0	0	0	27.4216	0	0	27.4216	24.6795	2.74216	0	0	0	0	0	0	0	2.74216	0		Western and Central Africa	0	7.40943	225.459	0	0
EAF3								1		274	0	0	0	0	0	0	0	0.00364964	0	5708.05	0	0	0	0	0	0	0	20.8323	0	20.8323	20.8323	8.33292	27.082	0	0	0	0	0	0	0	27.082	0		Eastern and Southern Africa	0	66.4177	0	0	0
EAF4		3						3		279	0	0.0107527	0	0	0	0	0	0.0107527	0	11300	0	121.506	0	0	0	0	0	121.506	0	40.5019	243.011	64.803	129.606	0	64.803	0	0	0	0	0	64.803	0		Western and Central Asia	0	0	0	0	0
EAS2										3	0	0	0	0	0	0	0	0	0	134.312	0	0	0	0	0	0	0	0	0	44.7706	0	13.4312	0	0	0	0	0	0	0	0	0	0		East Asia	0	0	0	0	0
EAS3										35	0	0	0	0	0	0	0	0	0	647.787	0	0	0	0	0	0	0	0	0	0	0	3.70164	0	0	0	0	0	0	0	0	0	0		South and Southeast Asia	1139.87	0	166.571	109.041	32.9959
EAS4										11	0	0	0	0	0	0	0	0	0	454.441	0	0	0	0	0	0	0	0	0	0	0	12.3939	0	0	0	0	0	0	0	0	0	0		Oceania	0	0	11.0451	0	0
NCA1								1		674	0	0	0	0	0	0	0	0.00148368	0	1556.67	0	0	0	0	0	0	0	2.3096	0	16.1672	2.3096	13.1647	7.85264	0	0	0	0	0	0	0	7.85264	0		World	1192.97	168.159	451.287	111.486	32.9959
NCA2		1				2		1		311	0	0.00321543	0	0	0	0.00643087	0	0.00321543	0	9855.08	0	31.6884	0	0	0	63.3767	0	31.6884	0	126.753	126.753	63.3767	91.8962	0	22.9741	0	0	0	45.9481	0	22.9741	0
NCA3	1		1			1		1		951	0.00105152	0	0.00105152	0	0	0.00105152	0	0.00105152	0	19863.9	20.8874	0	20.8874	0	0	20.8874	0	20.8874	0	0	83.5495	4.17747	50.1297	12.5324	0	12.5324	0	0	12.5324	0	12.5324	0
NCA4	1	2	1			1				746	0.00134048	0.00268097	0.00134048	0	0	0.00134048	0	0	0	27725.7	37.1658	74.3316	37.1658	0	0	37.1658	0	0	0	111.497	185.829	111.497	178.396	35.6792	71.3583	35.6792	0	0	35.6792	0	0	0		Variance
OCE1						4				410	0	0	0	0	0	0.0097561	0	0	0	1005.16	0	0	0	0	0	9.80643	0	0	0	19.6129	9.80643	6.37418	9.80643	0	0	0	0	0	9.80643	0	0	0			VAquac0010	VCoal0010	VDsettle0010	VIndsettle0010	VNDisast0010
OCE2										159	0	0	0	0	0	0	0	0	0	4380.78	0	0	0	0	0	0	0	0	0	0	0	5.51042	5.51042	0	0	0	0	0	0	0	0	0		North and C. America	1817.58	3763.04	1817.58	0	0
OCE3										1085	0	0	0	0	0	0	0	0	0	22714.1	0	0	0	0	0	0	0	0	0	20.9347	0	16.7478	6.28041	0	0	0	0	0	0	0	0	0		South America	10.3369	0	0	5.17126	0
OCE4			1			3				781	0	0	0.00128041	0	0	0.00384123	0	0	0	31367.9	0	0	40.1638	0	0	120.491	0	0	0	0	160.655	44.1802	44.1802	0	0	11.0451	0	0	33.1352	0	0	0		Western and Central Africa	0	10.9898	8091.99	0	0
SAM1	2			1		9				1832	0.0010917	0	0	0.000545852	0	0.00491266	0	0	0	4166.04	4.54808	0	0	2.27404	0	20.4664	0	0	0	270.611	27.2885	209.212	29.3351	4.88919	0	0	2.44459	0	22.0013	0	0	0		Eastern and Southern Africa	0	4891.12	0	0	0
SAM2						4				303	0	0	0	0	0	0.0132013	0	0	0	9177.58	0	0	0	0	0	121.156	0	0	0	121.156	121.156	157.503	87.8382	0	0	0	0	0	87.8382	0	0	0		Western and Central Asia	0	0	0	0	0
SAM3						1				502	0	0	0	0	0	0.00199203	0	0	0	10931.2	0	0	0	0	0	21.7752	0	0	0	21.7752	21.7752	50.083	34.8403	0	0	0	0	0	34.8403	0	0	0		East Asia	0	0	0	0	0
SAM4						5				688	0	0	0	0	0	0.00726744	0	0	0	25224.5	0	0	0	0	0	183.317	0	0	0	0	183.317	91.6587	208.982	0	0	0	0	0	208.982	0	0	0		South and Southeast Asia	41142.9	0	6765.73	4627.67	1212.6
SSA1	71		2			8	2	4	4	3278	0.0216595	0	0.000610128	0	0	0.00244051	0.000610128	0.00122026	0.00122026	7598.72	164.585	0	4.63619	0	0	18.5448	4.63619	9.27239	9.27239	229.492	210.947	166.671	168.757	131.668	0	3.70895	0	0	14.8358	3.70895	7.41791	7.41791		Oceania	0	0	1613.13	0	0
SSA2	14		2	4	1	3	1		8	952	0.0147059	0	0.00210084	0.00420168	0.00105042	0.00315126	0.00105042	0	0.00840336	27625.8	406.262	0	58.0375	116.075	29.0187	87.0562	29.0187	0	232.15	493.319	957.618	365.636	644.216	273.304	0	39.0434	78.0868	19.5217	58.5651	19.5217	0	156.174		World	42970.8	8665.15	18288.4	4632.84	1212.6
SSA3	4				1	3	3	3	2	2058	0.00194363	0	0	0	0.000485909	0.00145773	0.00145773	0.00145773	0.000971817	39614.1	76.9953	0	0	0	19.2488	57.7464	57.7464	57.7464	38.4976	96.2441	307.981	75.0704	215.587	53.8967	0	0	0	13.4742	40.4225	40.4225	40.4225	26.9483
SSA4	22		4	1		10	3	2	9	2117	0.0103921	0	0.00188947	0.000472367	0	0.00472367	0.0014171	0.000944733	0.0042513	75442	783.998	0	142.545	35.6363	0	356.363	106.909	71.2726	320.727	641.453	1817.45	445.454	1578.69	681.003	0	123.819	30.9547	0	309.547	92.864	61.9093	278.592
WAF1		2	1					2		1844	0	0.0010846	0.000542299	0	0	0	0	0.0010846	0	4323.73	0	4.68951	2.34476	0	0	0	0	4.68951	0	11.7238	11.7238	4.92399	18.5236	0	7.40943	3.70471	0	0	0	0	7.40943	0
WAF2			4							263	0	0	0.0152091	0	0	0	0	0	0	7939.06	0	0	120.746	0	0	0	0	0	0	30.1865	120.746	3.01865	84.5223	0	0	84.5223	0	0	0	0	0	0
WAF3			4							377	0	0	0.0106101	0	0	0	0	0	0	7256.01	0	0	76.9868	0	0	0	0	0	0	0	76.9868	3.84934	73.1375	0	0	73.1375	0	0	0	0	0	0
WAF4			2					2		668	0	0	0.00299401	0	0	0	0	0.00299401	0	25948.7	0	0	77.6908	0	0	0	0	77.6908	0	77.6908	155.382	38.8454	128.19	0	0	64.0949	0	0	0	0	64.0949	0
WAS3										26	0	0	0	0	0	0	0	0	0	645.806	0	0	0	0	0	0	0	0	0	0	0	0	0	0	0	0	0	0	0	0	0	0
WAS4										15	0	0	0	0	0	0	0	0	0	727.027	0	0	0	0	0	0	0	0	0	0	0	0	0	0	0	0	0	0	0	0	0	0
	115	9	22	6	2	54	9	21	23	20954
2010-20																														Total changes				Area Km2 calibrated										km2
	counts										proportion									km2	Raw									from centroids		from hexagons													Aquac1020	Coal1020	Dsettle1020	Indsettle1020	NDisast1020
Strata	Aquac1020	Coal1020	Dsettle1020	Indsettle1020	NDisast1020	Retract1020	Oil palm1020	Other1020	Rice1020	nsamp	Aquac1020	Coal1020	Dsettle1020	Indsettle1020	NDisast1020	Retract1020	Oil palm1020	Other1020	Rice1020	AreaStr	Aquac1020	Coal1020	Dsettle1020	Indsettle1020	NDisast1020	Retract1020	Oil palm1020	Other1020	Rice1020	MgrGain 1020	MgrLoss 1020	Mgrgain 2010-2020	Mgrloss 2010-2020	Aquac1020	Coal1020	Dsettle1020	Indsettle1020	NDisast1020	Retract1020	Oil palm1020	Other1020	Rice1020		North and C. America	56.9875	0	9.62018	53.8445	2.3096
EAF1		1								208	0	0.00480769	0	0	0	0	0	0	0	479.798	0	2.30672	0	0	0	0	0	0	0	2.30672	2.30672	2.30672	1.15336	0	1.15336	0	0	0	0	0	0	0		South America	65.4522	1.79649	0	23.1364	0
EAF2										104	0	0	0	0	0	0	0	0	0	2851.85	0	0	0	0	0	0	0	0	0	54.8432	0	35.6481	19.1951	0	0	0	0	0	0	0	0	0		Western and Central Africa	108.755	5.78974	7.71966	55.3423	0
EAF3								1		274	0	0	0	0	0	0	0	0.00364964	0	5708.05	0	0	0	0	0	0	0	20.8323	0	20.8323	20.8323	27.082	27.082	0	0	0	0	0	0	0	27.082	0		Eastern and Southern Africa	0	32.2048	0	0	0
EAF4		1						2		279	0	0.00358423	0	0	0	0	0	0.00716846	0	11300	0	40.5019	0	0	0	0	0	81.0037	0	121.506	121.506	109.355	93.1543	0	31.0514	0	0	0	0	0	62.1029	0		Western and Central Asia	0	0	0	0	0
EAS2										3	0	0	0	0	0	0	0	0	0	134.312	0	0	0	0	0	0	0	0	0	0	0	0	0	0	0	0	0	0	0	0	0	0		East Asia	0	0	0	0	0
EAS3										35	0	0	0	0	0	0	0	0	0	647.787	0	0	0	0	0	0	0	0	0	0	0	9.2541	0	0	0	0	0	0	0	0	0	0		South and Southeast Asia	344.163	0	34.6774	130.7	92.018
EAS4										11	0	0	0	0	0	0	0	0	0	454.441	0	0	0	0	0	0	0	0	0	41.3129	0	16.5251	0	0	0	0	0	0	0	0	0	0		Oceania	0	0	0	0	0
NCA1			1		1	2		1		674	0	0	0.00148368	0	0.00148368	0.00296736	0	0.00148368	0	1556.67	0	0	2.3096	0	2.3096	4.6192	0	2.3096	0	13.8576	11.548	13.3957	11.548	0	0	2.3096	0	2.3096	4.6192	0	2.3096	0		World	575.357	39.791	52.0172	263.023	94.3276
NCA2				1				1		311	0	0	0	0.00321543	0	0	0	0.00321543	0	9855.08	0	0	0	31.6884	0	0	0	31.6884	0	158.442	63.3767	66.5455	50.7014	0	0	0	25.3507	0	0	0	25.3507	0
NCA3			1					1		951	0	0	0.00105152	0	0	0	0	0.00105152	0	19863.9	0	0	20.8874	0	0	0	0	20.8874	0	41.7747	41.7747	45.9522	14.6212	0	0	7.31058	0	0	0	0	7.31058	0
NCA4	2			1		2			1	746	0.00268097	0	0	0.00134048	0	0.00268097	0	0	0.00134048	27725.7	74.3316	0	0	37.1658	0	74.3316	0	0	37.1658	222.995	222.995	182.112	170.963	56.9875	0	0	28.4938	0	56.9875	0	0	28.4938		Variance
OCE1						8				410	0	0	0	0	0	0.0195122	0	0	0	1005.16	0	0	0	0	0	19.6129	0	0	0	4.90322	19.6129	3.43225	8.82579	0	0	0	0	0	8.82579	0	0	0			VAquac1020	VCoal1020	VDsettle1020	VIndsettle1020	VNDisast1020
OCE2										159	0	0	0	0	0	0	0	0	0	4380.78	0	0	0	0	0	0	0	0	0	27.5521	0	5.51042	0	0	0	0	0	0	0	0	0	0		North and C. America	2758.88	0	441.616	2385.45	5.33425
OCE3										1085	0	0	0	0	0	0	0	0	0	22714.1	0	0	0	0	0	0	0	0	0	0	0	10.4673	0	0	0	0	0	0	0	0	0	0		South America	2271.97	5.17126	0	499.96	0
OCE4						2				781	0	0	0	0	0	0.00256082	0	0	0	31367.9	0	0	0	0	0	80.3276	0	0	0	80.3276	80.3276	8.03276	48.1966	0	0	0	0	0	48.1966	0	0	0		Western and Central Africa	3018.9	16.4757	21.9557	1514.46	0
SAM1	2	1		5		30		1		1832	0.0010917	0.000545852	0	0.00272926	0	0.0163755	0	0.000545852	0	4166.04	4.54808	2.27404	0	11.3702	0	68.2212	0	2.27404	0	97.7838	90.9616	91.4164	71.8597	3.59298	1.79649	0	8.98246	0	53.8948	0	1.79649	0		Eastern and Southern Africa	0	1645.72	0	0	0
SAM2	1					2		1		303	0.00330033	0	0	0	0	0.00660066	0	0.00330033	0	9177.58	30.289	0	0	0	0	60.5781	0	30.289	0	181.734	121.156	118.127	151.445	37.8613	0	0	0	0	75.7226	0	37.8613	0		Western and Central Asia	0	0	0	0	0
SAM3				1			1			502	0	0	0	0.00199203	0	0	0.00199203	0	0	10931.2	0	0	0	21.7752	0	0	21.7752	0	0	87.1009	43.5504	39.1954	28.3078	0	0	0	14.1539	0	0	14.1539	0	0		East Asia	0	0	0	0	0
SAM4	1					9		1		688	0.00145349	0	0	0	0	0.0130814	0	0.00145349	0	25224.5	36.6635	0	0	0	0	329.971	0	36.6635	0	219.981	403.298	139.321	263.977	23.9979	0	0	0	0	215.981	0	23.9979	0		South and Southeast Asia	11911.9	0	1280.69	5094.05	3806.23
SSA1	22		2	4		13	12	1	2	3278	0.00671141	0	0.000610128	0.00122026	0	0.00396583	0.00366077	0.000305064	0.000610128	7598.72	50.9981	0	4.63619	9.27239	0	30.1353	27.8172	2.3181	4.63619	118.223	134.45	101.301	116.137	44.0518	0	4.00471	8.00942	0	26.0306	24.0283	2.00236	4.00471		Oceania	0	0	0	0	0
SSA2	5					4	9	3	1	952	0.0052521	0	0	0	0	0.00420168	0.00945378	0.00315126	0.00105042	27625.8	145.094	0	0	0	0	116.075	261.169	87.0562	29.0187	435.281	638.412	258.267	510.73	116.075	0	0	0	0	92.86	208.935	69.645	23.215		World	19961.6	1667.37	1744.26	9493.92	3811.57
SSA3							3	1		2058	0	0	0	0	0	0	0.00145773	0.000485909	0	39614.1	0	0	0	0	0	0	57.7464	19.2488	0	134.742	76.9953	140.516	90.4694	0	0	0	0	0	0	67.8521	22.6174	0
SSA4	6		1	4	3	4	2	6	1	2117	0.0028342	0	0.000472367	0.00188947	0.0014171	0.00188947	0.000944733	0.0028342	0.000472367	75442	213.818	0	35.6363	142.545	106.909	142.545	71.2726	213.818	35.6363	320.727	997.816	349.236	858.835	184.036	0	30.6727	122.691	92.018	122.691	61.3453	184.036	30.6727
WAF1	1	3	4	1		1		3		1844	0.000542299	0.0016269	0.0021692	0.000542299	0	0.000542299	0	0.0016269	0	4323.73	2.34476	7.03427	9.37903	2.34476	0	2.34476	0	7.03427	0	7.03427	30.4818	3.04818	25.0889	1.92991	5.78974	7.71966	1.92991	0	1.92991	0	5.78974	0
WAF2						3				263	0	0	0	0	0	0.0114068	0	0	0	7939.06	0	0	0	0	0	90.5596	0	0	0	30.1865	90.5596	48.2984	63.3917	0	0	0	0	0	63.3917	0	0	0
WAF3								1		377	0	0	0	0	0	0	0	0.00265252	0	7256.01	0	0	0	0	0	0	0	19.2467	0	0	19.2467	1.92467	30.7947	0	0	0	0	0	0	0	30.7947	0
WAF4	2			1				1		668	0.00299401	0	0	0.00149701	0	0	0	0.00149701	0	25948.7	77.6908	0	0	38.8454	0	0	0	38.8454	0	155.382	155.382	19.4227	213.65	106.825	0	0	53.4124	0	0	0	53.4124	0
WAS3										26	0	0	0	0	0	0	0	0	0	645.806	0	0	0	0	0	0	0	0	0	0	0	0	0	0	0	0	0	0	0	0	0	0
WAS4										15	0	0	0	0	0	0	0	0	0	727.027	0	0	0	0	0	0	0	0	0	0	0	0	0	0	0	0	0	0	0	0	0	0
	42	6	9	18	4	80	27	25	5	20954
[truncated: 4 more columns]

## Sheet: Drivers of Mangrove Gain
2000-10									Total changes								km2
	counts			proportion		km2	Raw		from centroids		from hexagons		Area Km2 calibrated					Natural expansion00-10	Restoration00-10
Strata	Natural expansion00-10	Restoration00-10	nsamp	Natural expansion00-10	Restoration00-10	AreaStr	Natural expansion00-10	Restoration00-10	MgrGain 0010	MgrLoss 0010	Mgrgain 2000-2010	Mgrloss 2000-2010	Natural expansion00-10	Restoration00-10			North and C. America	188.039	0
EAF1	8		208	0.0384615	0	479.798	18.4538	0	18.4538	2.30672	8.53487	1.61471	8.53487	0			South America	368.632	48.1662
EAF2			104	0	0	2851.85	0	0	0	27.4216	24.6795	2.74216	0	0			Western and Central Africa	27.3653	19.4227
EAF3		1	274	0	0.00364964	5708.05	0	20.8323	20.8323	20.8323	8.33292	27.082	0	8.33292			Eastern and Southern Africa	73.3379	8.33292
EAF4	1		279	0.00358423	0	11300	40.5019	0	40.5019	243.011	64.803	129.606	64.803	0			Western and Central Asia	0	0
EAS2		1	3	0	0.333333	134.312	0	44.7706	44.7706	0	13.4312	0	0	13.4312			East Asia	0	13.4312
EAS3			35	0	0	647.787	0	0	0	0	3.70164	0	0	0			South and Southeast Asia	812.641	240.19
EAS4			11	0	0	454.441	0	0	0	0	12.3939	0	0	0			Oceania	23.1219	0
NCA1	7		674	0.0103858	0	1556.67	16.1672	0	16.1672	2.3096	13.1647	7.85264	13.1647	0			World	1493.14	329.543
NCA2	4		311	0.0128617	0	9855.08	126.753	0	126.753	126.753	63.3767	91.8962	63.3767	0
NCA3			951	0	0	19863.9	0	0	0	83.5495	4.17747	50.1297	0	0
NCA4	3		746	0.00402145	0	27725.7	111.497	0	111.497	185.829	111.497	178.396	111.497	0			Variance
OCE1	8		410	0.0195122	0	1005.16	19.6129	0	19.6129	9.80643	6.37418	9.80643	6.37418	0				VNatural expansion00-10	VRestoration00-10
OCE2			159	0	0	4380.78	0	0	0	0	5.51042	5.51042	0	0			North and C. America	8147.51	0
OCE3	1		1085	0.000921659	0	22714.1	20.9347	0	20.9347	0	16.7478	6.28041	16.7478	0			South America	3761.35	943.225
OCE4			781	0	0	31367.9	0	0	0	160.655	44.1802	44.1802	0	0			Western and Central Africa	2447.62	1508.96
SAM1	114	5	1832	0.0622271	0.00272926	4166.04	259.241	11.3702	270.611	27.2885	209.212	29.3351	200.421	8.79041			Eastern and Southern Africa	1681.53	433.985
SAM2	3	1	303	0.00990099	0.00330033	9177.58	90.8671	30.289	121.156	121.156	157.503	87.8382	118.127	39.3757			Western and Central Asia	0	0
SAM3	1		502	0.00199203	0	10931.2	21.7752	0	21.7752	21.7752	50.083	34.8403	50.083	0			East Asia	0	2004.41
SAM4			688	0	0	25224.5	0	0	0	183.317	91.6587	208.982	0	0			South and Southeast Asia	30018.7	9272.31
SSA1	86	13	3278	0.0262355	0.00396583	7598.72	199.356	30.1353	229.492	210.947	166.671	168.757	144.785	21.8861			Oceania	485.522	0
SSA2	11	6	952	0.0115546	0.00630252	27625.8	319.206	174.112	493.319	957.618	365.636	644.216	236.588	129.048			World	46542.3	14162.9
SSA3	4	1	2058	0.00194363	0.000485909	39614.1	76.9953	19.2488	96.2441	307.981	75.0704	215.587	60.0563	15.0141
SSA4	15	3	2117	0.0070855	0.0014171	75442	534.544	106.909	641.453	1817.45	445.454	1578.69	371.211	74.2423
WAF1	5		1844	0.0027115	0	4323.73	11.7238	0	11.7238	11.7238	4.92399	18.5236	4.92399	0
WAF2	1		263	0.00380228	0	7939.06	30.1865	0	30.1865	120.746	3.01865	84.5223	3.01865	0
WAF3			377	0	0	7256.01	0	0	0	76.9868	3.84934	73.1375	0	0
WAF4	1	1	668	0.00149701	0.00149701	25948.7	38.8454	38.8454	77.6908	155.382	38.8454	128.19	19.4227	19.4227
WAS3			26	0	0	645.806	0	0	0	0	0	0	0	0
WAS4			15	0	0	727.027	0	0	0	0	0	0	0	0
Grand Total	273	32	20954						2413.17	4874.85	2012.83	3827.71	1493.14	329.543
																	km2
2010-2020									Total changes				Area Km2 calibrated					Natural expansion1020	Restoration1020
	counts			proportion		km2	Raw		from centroids		from hexagons						North and C. America	308.006	0
Strata	Natural expansion1020	Restoration1020	nsamp	Natural expansion1020	Restoration1020	AreaStr	Natural expansion1020	Restoration1020	MgrGain 1020	MgrLoss 1020	Mgrgain 2010-2020	Mgrloss 2010-2020	Natural expansion1020	Restoration1020			South America	388.06	0
EAF1	1		208	0.00480769	0	479.798	2.30672	0	2.30672	2.30672	2.30672	1.15336	2.30672	0			Western and Central Africa	70.7693	0
EAF2	2		104	0.0192308	0	2851.85	54.8432	0	54.8432	2.30672	35.6481	19.1951	35.6481	0			Eastern and Southern Africa	74.4065	99.9854
EAF3		1	274	0	0.00364964	5708.05	0	20.8323	20.8323	0	27.082	27.082	0	27.082			Western and Central Asia	0	0
EAF4	1	2	279	0.00358423	0.00716846	11300	40.5019	81.0037	121.506	20.8323	109.355	93.1543	36.4517	72.9034			East Asia	0	16.5251
EAS2			3	0	0	134.312	0	0	0	0	0	0	0	0			South and Southeast Asia	616.814	232.506
EAS3			35	0	0	647.787	0	0	0	0	9.2541	0	0	0			Oceania	16.9754	0
EAS4		1	11	0	0.0909091	454.441	0	41.3129	41.3129	0	16.5251	0	0	16.5251			World	1475.03	349.017
NCA1	6		674	0.00890208	0	1556.67	13.8576	0	13.8576	11.548	13.3957	11.548	13.3957	0
NCA2	5		311	0.0160772	0	9855.08	158.442	0	158.442	11.548	66.5455	50.7014	66.5455	0
NCA3	2		951	0.00210305	0	19863.9	41.7747	0	41.7747	63.3767	45.9522	14.6212	45.9522	0			Variance
NCA4	6		746	0.0080429	0	27725.7	222.995	0	222.995	41.7747	182.112	170.963	182.112	0			Etichette di riga	VNatural expansion1020	VRestoration1020
OCE1	2		410	0.00487805	0	1005.16	4.90322	0	4.90322	19.6129	3.43225	8.82579	3.43225	0			North and C. America	14091.5	0
OCE2	1		159	0.00628931	0	4380.78	27.5521	0	27.5521	19.6129	5.51042	0	5.51042	0			South America	15522.5	0
OCE3			1085	0	0	22714.1	0	0	0	0	10.4673	0	0	0			Western and Central Africa	6936.41	0
OCE4	2		781	0.00256082	0	31367.9	80.3276	0	80.3276	0	8.03276	48.1966	8.03276	0			Eastern and Southern Africa	3135.01	3702.99
SAM1	43		1832	0.0234716	0	4166.04	97.7838	0	97.7838	90.9616	91.4164	71.8597	91.4164	0			Western and Central Asia	0	0
SAM2	6		303	0.019802	0	9177.58	181.734	0	181.734	90.9616	118.127	151.445	118.127	0			East Asia	0	1706.75
SAM3	4		502	0.00796813	0	10931.2	87.1009	0	87.1009	121.156	39.1954	28.3078	39.1954	0			South and Southeast Asia	18404.3	8396.31
SAM4	6		688	0.00872093	0	25224.5	219.981	0	219.981	43.5504	139.321	263.977	139.321	0			Oceania	3993.24	0
SSA1	46	5	3278	0.0140329	0.00152532	7598.72	106.632	11.5905	118.223	134.45	101.301	116.137	91.3694	9.93145			World	62083.1	13806.1
SSA2	10	5	952	0.0105042	0.0052521	27625.8	290.187	145.094	435.281	134.45	258.267	510.73	172.178	86.0889
SSA3	6	1	2058	0.00291545	0.000485909	39614.1	115.493	19.2488	134.742	638.412	140.516	90.4694	120.443	20.0738
SSA4	6	3	2117	0.0028342	0.0014171	75442	213.818	106.909	320.727	76.9953	349.236	858.835	232.824	116.412
WAF1	3		1844	0.0016269	0	4323.73	7.03427	0	7.03427	30.4818	3.04818	25.0889	3.04818	0
WAF2	1		263	0.00380228	0	7939.06	30.1865	0	30.1865	30.4818	48.2984	63.3917	48.2984	0
WAF3			377	0	0	7256.01	0	0	0	90.5596	1.92467	30.7947	0	0
WAF4	4		668	0.00598802	0	25948.7	155.382	0	155.382	19.2467	19.4227	213.65	19.4227	0
WAS3			26	0	0	645.806	0	0	0	0	0	0	0	0
WAS4			15	0	0	727.027	0	0	0	0	0	0	0	0
Grand Total	163	18	20954
